# Supplementary material for: Biomechanical evaluation of cervical disc replacement with a novel prosthesis based on the physiological curvature of endplate
Source: J Orthop Surg Res. 2018 Feb 27;13:41. doi: 10.1186/s13018-018-0748-7 (PMC5828121; doi:10.1186/s13018-018-0748-7)
Supplement: Supplementary file 1 — The original data on the ROM and IDP of the cadaveric cervical specimens. (XLSX 16 kb) [file 13018_2018_748_MOESM1_ESM.xlsx]

## Sheet: Sheet1
C5-6	正常组			Pretic置换组			Prestige lp置换组			融合组				C5-6	ROM
标本	屈伸	侧弯	轴向旋转	屈伸	侧弯	轴向旋转	屈伸	侧弯	轴向旋转	屈伸	侧弯	轴向旋转			屈伸	侧偏	旋转
1	7.45	10.67	5.87	8.25	10.32	5.78	8.15	10.12	6.78	2.92	5.31	4.35		正常	8.83±1.51	12.67±1.60	7.56±1.31
2	8.44	12.76	6.96	9.35	13.14	7.21	9.45	13.34	7.25	4.8	6.76	4.7		pretic	9.68±1.73	13.46±2.11	7.36±1.20
3	7.23	10.78	6.84	7.25	11.76	6.34	7.05	11.56	5.34	2.54	3.12	2.5		prestige	9.55±1.73	13.09±1.98	7.66±1.57
4	8.56	13.42	8.45	10.23	14.56	7.45	9.89	13.26	7.87	5.6	7.78	4.4		融合	3.73±1.21	5.26±1.74	4.75±1.44
5	10.42	14.17	7.67	11.65	15.73	8.83	11.5	15.23	9.13	3.56	4.12	6.67
6	10.87	14.23	9.56	11.34	15.23	8.56	11.23	15.01	9.6	2.95	4.47	5.9
C4-5	上位节段
	正常组			Pretic置换组			Prestige lp置换组			融合组				C4-5	上位节段
标本	屈伸	侧弯	轴向旋转	屈伸	侧弯	轴向旋转	屈伸	侧弯	轴向旋转	屈伸	侧弯	轴向旋转		ROM	屈伸	侧弯	旋转
1	11.67	12.67	8.23	12.1	12.12	9.23	12.8	11.76	9.5	14.45	16.78	11.15		正常	9.32±1.41	12.41±1.58	7.23±1.47
2	10.12	10.7	7.3	12.56	10.23	8.45	12.44	9.77	8.1	13.34	14.87	9.98		pretic	10.49±1.57	12.10±1.43	7.65±1.26
3	8.52	10.32	5.52	9.45	11.35	6.54	9.56	11.56	6.78	11.21	13.75	9.43		prestige	10.33±1.88	11.85±1.50	7.79±1.19
4	7.89	12.88	5.8	8.87	11.34	5.87	8.55	10.88	6.2	10.78	11.55	7.32		融合	12.66±1.47	14.51±1.75	9.56±1.28
5	9.43	13.65	9.42	10.76	13.67	8.28	10.12	13.34	8.47	13.84	14.88	10.2
6	8.26	14.23	7.1	9.21	13.88	7.5	8.5	13.78	7.7	12.34	15.22	9.3
C6-7	下位节段
	正常组			Pretic置换组			Prestige lp置换组			融合组
标本	屈伸	侧弯	轴向旋转	屈伸	侧弯	轴向旋转	屈伸	侧弯	轴向旋转	屈伸	侧弯	轴向旋转		C6-7	下位节段
1	11.32	12.35	8.02	12.12	12	9.32	12.1	11.2	9.3	14.15	15.58	11.05		ROM	屈伸	侧弯	旋转
2	9.45	10.3	7.5	11.85	10.12	8.54	11.95	9.36	7.85	13.24	14.47	9.78		正常	8.78±1.41	11.96±1.53	7.12±1.55
3	8.12	9.88	5.12	9.3	11.15	6.23	9.65	11.23	6.55	11.12	13.5	9.13		pretic	10.24±1.51	11.74±1.35	7.45±1.41
4	7.53	12.44	5.3	8.5	10.59	5.57	8.25	10.45	5.98	10.5	11.25	7.12		prestige	9.94±1.74	11.36±1.43	7.59±1.20
5	8.43	13.12	8.95	10.56	13.33	7.82	9.58	12.69	8.35	13.49	14.48	9.89		融合	12.49±1.43	14.07±1.55	9.41±1.30
6	7.85	13.65	7.8	9.12	13.25	7.21	8.12	13.25	7.5	12.43	15.12	9.51
压力
上位节段	C4-5
正常组				pretic置换组				prestig lp置换组					C4-5	上位节段
屈	伸	侧弯	轴向旋转	屈	伸	侧弯	轴向旋转	屈	伸	侧弯	轴向旋转		压力	屈	伸	侧弯	旋转
108.22	42.78	58.65	35.88	105.55	40.75	55.48	33.8	110.45	44.67	60.25	38.42		正常	100.15±10.24	49.98±7.42	51.66±10.15	42.62±7.17
113.15	50.55	48.53	46.85	110.88	48.55	50.52	48.5	115.78	52.78	50.5	46.75		pretic	98.52±9.80	47.51±8.76	49.73±9.40	38.97±6.83
95.78	45.89	43.39	38.87	97.54	47.78	45.39	35.7	90.87	47.89	49.56	38.67		prestige	103.12±9.86	50.35±7.52	53.22±8.38	43.46±8.11
85.85	53.65	54.28	46.38	83.83	51.52	52.53	37.8	93.78	55.56	53.78	49.78
104.58	44.34	38.77	52.87	101.89	35.57	33.65	46.2	107.98	40.34	40.77	54.28
93.32	62.68	66.32	34.86	91.45	60.86	60.8	31.8	99.84	60.88	64.43	32.84
下位节段	C6-7
正常组				pretic置换组				prestig lp置换组
屈	伸	侧弯	轴向旋转	屈	伸	侧弯	轴向旋转	屈	伸	侧弯	轴向旋转
88.43	33.7	43.27	32.7	83.68	30.78	35.58	30.58	94.65	40.87	50.38	36.98		C6-7	上位节段
90.76	43.2	53.25	34.89	85.3	35.81	47.64	31.97	92.53	51.79	58.67	33.87		压力	屈	伸	侧弯	旋转
78.98	20.7	28.97	25.98	72.89	18.87	24.48	28.96	85.87	25.57	34.86	28.67		正常	80.51±9.17	38.17±10.31	46.64±10.92	37.74±9.69
67.45	51.2	60.75	53.78	62.83	44.65	50.83	47.52	74.56	57.89	66.8	51.68		pretic	75.22±8.91	32.21±8.35	39.77±9.77	35.22±7.31
84.78	38.7	42.9	35.44	78.69	31.58	35.49	31.52	90.95	46.97	48.9	42.48		prestige	86.53±7.75	45.31±11.17	53.34±11.22	39.93±8.39
72.67	41.5	50.67	43.63	67.94	31.57	44.58	40.78	80.63	48.74	60.4	45.89
整体ROM	正常组			Pretic置换组			Prestige lp置换组
标本	屈伸	侧弯	轴向旋转	屈伸	侧弯	轴向旋转	屈伸	侧弯	轴向旋转		整体	ROM
1	43.5	55.78	38	45.76	51.55	39.25	44.84	55.84	37.66			屈伸	侧偏	旋转
2	45.85	51.82	35.58	47.82	52.34	36.68	46.86	44.63	35.25		正常	45.93±3.43	55.80±3.91	38.24±4.96
3	48.28	57.89	40.56	50.88	58.82	42.65	49.73	58.38	41.46		pretic	46.86±2.76	55.44±3.91	39.25±3.72
4	40.75	50.65	35.55	43.48	53.64	37.87	42.32	53.85	36.54		prestige	46.49±2.88	54.52±5.10	38.33±4.53
5	46.86	57.75	32.87	44.56	54.83	34.57	45.54	57.68	33.35
6	50.36	60.88	46.87	48.65	61.48	44.48	49.62	56.75	45.74
